1 **Title**

2

3 A critical assessment of single-cell transcriptomes sampled following patch-clamp  
4 electrophysiology

5

6 **Authors**

7 Shreejoy J. Tripathy<sup>1,2,\*</sup>, Lilah Toker<sup>1,2</sup>, Claire Bomkamp<sup>2</sup>, B. Ogan Mancarci<sup>1,2</sup>, Manuel  
8 Belmadani<sup>1,2</sup>, Paul Pavlidis<sup>1,2\*</sup>

9

10 <sup>1</sup> Michael Smith Laboratories, University of British Columbia, Vancouver BC, Canada

11

12 <sup>2</sup> Department of Psychiatry, University of British Columbia, Vancouver BC, Canada

13

14 \* Corresponding Author

15 Email: [stripathy@mssl.ubc.ca](mailto:stripathy@mssl.ubc.ca)

16 Email: [paul@mssl.ubc.ca](mailto:paul@mssl.ubc.ca)

17

18

19 **Abstract**

20

21 Patch-seq, combining patch-clamp electrophysiology with single-cell RNA-sequencing  
22 (scRNAseq), enables unprecedented single-cell access to a neuron's transcriptomic,  
23 electrophysiological, and morphological features. Here, we present a systematic review and re-  
24 analysis of scRNAseq profiles from 4 recent patch-seq datasets, benchmarking these against  
25 analogous profiles from cellular-dissociation based scRNAseq. We found an increased  
26 likelihood for off-target cell-type mRNA contamination in patch-seq, likely due to the passage of  
27 the patch-pipette through the processes of adjacent cells. We also observed that patch-seq  
28 samples varied considerably in the amount of mRNA that could be extracted from each cell,  
29 strongly biasing the numbers of detectable genes. We present a straightforward marker gene-  
30 based approach for controlling for these artifacts and show that our method improves the  
31 correspondence between gene expression and electrophysiological features. Our analysis  
32 suggests that these technical confounds likely limit the interpretability of patch-seq based single-  
33 cell transcriptomes. However, we provide concrete recommendations for quality control steps  
34 that can be performed prior to costly RNA-sequencing to optimize the yield of high quality  
35 samples.

36

37 **Introduction**

38

39 Linking gene expression to a neuron's electrical and morphological features has long been a  
40 goal of cellular neuroscience. To this end, one strategy is to use the same patch-clamp  
41 electrode for electrophysiological characterization for mRNA sampling, for example, by  
42 aspirating the cell's cytosol into the patch-pipette (Eberwine et al., 1992; Sucher and Deitcher,  
43 1995; Toledo-Rodriguez et al., 2004; Toledo-Rodriguez and Markram, 2014; Kodama et al.,  
44 2012; Rossier et al., 2014). The aspirated mRNA transcripts can then be detected and  
45 quantified using RT-PCR (Eberwine et al., 1992; Sucher and Deitcher, 1995; Cauli et al., 1997;  
46 Toledo-Rodriguez et al., 2004; Kodama et al., 2012; Rossier et al., 2014) or other methods  
47 (Subkhankulova et al., 2010), allowing the quantification of multiple genes or transcripts.

48

49 Recently, a number of groups have published protocols for patch-seq that extend previous RT-  
50 PCR-based methods by quantifying patch-pipette sampled cellular mRNA transcripts using  
51 next-generation RNA-sequencing (Cadwell et al., 2015; Fuzik et al., 2016; Földy et al., 2016;  
52 Bardy et al., 2016; Cadwell et al., 2017b, 2017a). These protocols make use of recent technical  
53 improvements in single-cell RNA-sequencing (scRNAseq) that enable gene expression  
54 quantification from very low starting volumes of mRNA (Poulin et al., 2016; Tasic et al., 2017),  
55 such as those present in a single-cell or single-nucleus.

56  
57 Patch-seq mRNA sample collection differs from standard single-cell or single-nucleus RNAseq,  
58 in two major ways (Cadwell et al., 2017b, 2017a). First, as opposed to relying on dissociating  
59 cells into suspension, the micropipette used for electrical recording is used for mRNA extraction  
60 via aspiration. While guiding the patch pipette to (or from) the soma of a cell of interest, the  
61 pipette often must travel through the processes of other cells, presenting an opportunity for  
62 contamination. Second, the effectiveness of cell content aspiration is difficult to control, so the  
63 amount of mRNA extracted may tend to vary from cell to cell.

64  
65 Here, our goal was to investigate the quality of scRNAseq data profiled using patch-seq. Our  
66 strategy was to compare patch-seq derived scRNAseq data with analogous data sampled using  
67 cellular-dissociation based methods, from which multiple large and high-quality single-cell  
68 transcriptomic datasets are available (Tasic et al., 2016; Zeisel et al., 2015). Our findings  
69 suggest that sampling cellular mRNA using a patch-pipette induces technical artifacts that tend  
70 not to be present to the same degree in cellular-dissociation based scRNAseq data. Based on  
71 our findings, we provide approaches for detecting these technical issues and discuss strategies  
72 for generating high-quality patch-seq datasets in the future.

73

## 74 **Methods**

### 75 *Dataset overview*

76

77 We made use of 4 previously published patch-seq datasets (Cadwell, Földy, Fuzik, Bardy)  
78 (Bardy et al., 2016; Cadwell et al., 2015; Földy et al., 2016; Fuzik et al., 2016), reflecting, to our  
79 knowledge, all of the published patch-seq datasets as of January 2018. We compared these to  
80 2 cellular dissociation-based single-cell RNAseq datasets (Tasic, Zeisel) (Tasic et al., 2016;  
81 Zeisel et al., 2015). We downloaded single-cell transcriptomic data from each study from  
82 accessions provided in Table 1 and Supplementary Table 1 or by contacting the authors directly.  
83 We obtained patch-seq-based electrophysiological data for the Cadwell and Fuzik datasets from  
84 the authors. For all patch-seq datasets, electrophysiological data were provided as a  
85 spreadsheet containing a set of summarized electrophysiological features per cell (e.g., input  
86 resistance, resting membrane potential, etc.). Electrophysiological data from the Allen Institute  
87 Cell Types database ([celltypes.brain-map.org](http://celltypes.brain-map.org)) were obtained and processed as described  
88 previously (Tripathy et al., 2017).

89

### 90 *Transcriptome data pre-processing*

91

92 We reprocessed transcriptomic data for the Cadwell, Földy, and Tasic datasets directly from  
93 Gene Expression Omnibus (GEO) or Array Express. Data from GEO was downloaded using  
94 fastq-dump version 2.8.2 from the Sequence Read Archive Toolkit. Technical reads such as  
95 barcodes and primers were filtered out during extraction. Adapter sequences were clipped from  
96 the raw reads. The list of options used is as follows: '--gzip --skip-technical --readids --dumpbase  
97 --split-files --clip'. Data from ArrayExpress was downloaded and used directly as prepared by  
98 the European Bioinformatics Institute.

99

100 The reference mouse transcriptome was produced using the 'rsem-prepare-reference' script  
101 provided by the RSEM RNA-Seq transcript quantifier (Li and Dewey, 2011). The assembly  
102 version used was Ensembl GRCm38, packaged by Illumina for the iGenomes collection.  
103 Alignment was performed using STAR (Dobin et al., 2013) version 2.4.0h, provided as the  
104 aligner to RSEM v1.2.31. Default parameters were used (with the exception of parallel  
105 processing and logging related options). Transcript definitions used to detect ERCC spike-ins  
106 were obtained from the ERCC92 version fasta and GTF files. Spike-ins were concatenated to  
107 the GRCm38 assembly before applying rsem-prepare-reference, and independently to create a  
108 standalone ERCC assembly. Both the concatenated and standalone spike-ins assemblies  
109 showed highly comparable proportions of spike-in expression. For the Fuzik and Zeisel  
110 datasets, we made use of the quantified summarized unique molecule counts (UMIs) made  
111 available at GEO. For the Bardy dataset, we used the summarized count matrices directly  
112 provided by the authors.

113

#### 114 *Mapping of mouse patch-seq cell types onto taxonomies derived from dissociated cells*

115

116 Using descriptions for cellular identities provided in the original patch-seq publications, we  
117 manually mapped each of the cell types represented across the three mouse patch-seq  
118 datasets onto transcriptomically-defined cellular clusters reported in the two dissociated cell  
119 datasets (shown in Supplementary Table 2). For example, given that the elongated  
120 neurogliaform cells and single bouquet cells characterized in Cadwell are both cortical layer 1  
121 cells, we manually mapped these to the layer 1 cells defined in Tasic as *Ndnf* cells. Similarly, we  
122 mapped the hippocampal regular-spiking interneurons characterized in Foldy to the *Sncg* cluster  
123 from Tasic (personal communication with Csaba Földy). To align cell subtype clusters between  
124 Tasic and Zeisel, we used mappings provided by MetaNeighbor (Crow et al., 2018) (shown in  
125 Supplementary Table 2). The mappings between broad cell types in Tasic with Zeisel are  
126 provided in Supplementary Table 3. As with our previous work mapping cells and cell types  
127 across datasets (Mancarci et al., 2017; Tripathy et al., 2017), we note that these cross-dataset  
128 mappings are approximate and ideally would be guided by the use methods for unambiguously  
129 aligning cell types across experiments (e.g., transgenic mouse lines with specific cell types  
130 labeled by fluorescent proteins).

131

#### 132 *Identification of cell type-specific marker genes*

133

134 For this study, we defined two classes of marker genes, termed “on” and “off” markers. The first  
135 class, “on” markers, are genes that are highly and ubiquitously expressed in the cell type of  
136 interest with enriched expression relative to other cell types. The second class, “off” markers,  
137 are expected to be expressed at low levels in a given patch-seq cell type. These are genes that  
138 are specifically expressed in a single cell type (e.g., microglia) and, if expressed, are an  
139 indicator of possible cellular contamination. To identify marker genes, we employed two recent  
140 surveys of mouse cortical diversity from Tasic et al. and Zeisel et al. (Tasic et al., 2016; Zeisel et  
141 al., 2015).

142

143 To identify “on” marker genes, we initially used the Tasic dataset, and selected genes whose  
144 average expression in the chosen cell type was >10 times relative all other cell types in the  
145 dataset, with an average expression in the cell type of >100 TPM. From this initial gene list, we  
146 next filtered these genes to only include those that were expressed >10 TPM/cell in >75% of all  
147 cells of that type in Tasic, and >1 UMI/cell in >50% of all cells of that type in Zeisel. Using the  
148 Tasic nomenclature, we defined “on” markers for *Ndnf*, *Sncg*, *Pvalb*, and *Pyramidal* cell types.

149

150 To identify “off” marker genes for broad cell types (shown in Supplementary Table 3), as an  
151 initial listing we used the set of cell type-specific marker genes for broad cell classes in the  
152 mouse cortex, defined in our previous work using the NeuroExpresso database (Tasic et al.,  
153 2016). Specifically, we used the set of cortical markers derived from single-cell RNA-seq for  
154 astrocytes, endothelial cells, microglia, oligodendrocytes, oligodendrocyte precursor cells, and  
155 pyramidal cells. From this list, we first filtered out lowly expressed genes that were expressed  
156 <10 TPM/cell in >50% of all cells of that type in Tasic, and <1 UMI/cell in >50% of all cells of  
157 that type in Zeisel. Next, we filtered genes too broadly expressed in our patch-seq cell types of  
158 interest by assessing the expression of these genes in the *Ndnf*, *Sncg*, *Pvalb*, and Pyramidal  
159 cell types, removing genes that were expressed at a level greater than >10 TPM/cell in >33% of  
160 all cells of that type in Tasic, and >2 UMI/cell in >33% of all cells of that type in Zeisel.

161

162 When defining on and off marker genes for inhibitory cell subtypes (e.g., the *Ndnf* cell type), we  
163 did not compare these cells to other GABAergic cells. For example, when defining “on” markers  
164 for *Ndnf* cells, we did not compare these cells’ expression to *Pvalb* or *Sst* cells. We note that  
165 this choice limits our ability to identify inhibitory-to-inhibitory cell contamination, for example, an  
166 *Ndnf* cell contaminated by *Sst*-cell specific markers. To define an initial set of “off” markers for  
167 GABAergic inhibitory cells, we first obtained a list of genes based on Tasic where in GABAergic  
168 cells had average expression >10 times all other non-GABAergic cells in the dataset and with  
169 an average expression of at least 100 TPM.

170

171 The final list of filtered mouse cell type specific marker genes used in this study are provided in  
172 Supplementary Table 4.

173

174 To obtain a list of human cell type specific marker genes for use for the Bardy dataset, we made  
175 use of classic cell-type specific markers for astrocytes and microglia, based on human purified  
176 cell types shown in Figure 4A of reference (Zhang et al., 2016).

177

### 178 *Summarizing cell type-specific marker expression*

179

180 When directly comparing expression values from patch-seq data to dissociated cell data, we  
181 compared the Cadwell and Földy datasets to Tasic, as these all were quantified using TPM and  
182 employed Smart-seq-based methods. Similarly, we compared Fuzik dataset to Zeisel, as these  
183 both used C1-STRT and were quantified using unique molecule identifiers (UMIs), normalized  
184 as UMI counts per million. We summarized a single-cell sample’s expression of multiple cell  
185 type-specific markers using the sum of the log<sub>2</sub> normalized expression values. Given a patch-  
186 seq sample of cell type identity A (e.g., a pyramidal cell) and wanting to quantify its normalized  
187 expression of “off” markers for cell type B (e.g., microglial markers), we used the dissociated cell  
188 data to estimate the median expression of cell type B’s “markers in cells of type A (e.g., median  
189 expression level of microglial markers in pyramidal cells) and the median expression of cell type  
190 B’s markers in cells of type B (e.g., median expression level of microglial markers in microglia  
191 cells). Specifically, we normalized expression to a value of approximately 0 to 1, as follows:

192

$$193 \frac{(\text{PatchSeqCellTypeA\_markersB} - \text{median}(\text{DissocCellTypeA\_markersB}))}{\text{median}(\text{DissocCellTypeB\_markersB}) - \text{median}(\text{DissocCellTypeA\_markersB})}$$

194

195  
196 where we set all negative values to 0. Next, to obtain a single contamination index per single  
197 cell, we summed all contamination scores for all broad cell types, excluding the patch-seq cell’s  
198 assigned broad cell type.

199  
200 Lastly, to obtain a scalar quality score for transcriptomic data from patch-seq samples (e.g., for  
201 analysis of electrophysiological data), we used the Spearman correlation of each patch-seq  
202 sample's expression of "on" and "off" marker genes to the average expression profile of  
203 dissociated cells of the same cell type (shown in Supplement Figure 3). For example, for an  
204 *Ndnf* patch-seq sample from Cadwell, we first calculated the average expression profile of *Ndnf*  
205 cells from Tasic across the set of all "on" and "off" marker genes (i.e., *Ndnf* markers, pyramidal  
206 cell markers, astrocyte markers, etc.), and then calculated the correlation between the patch-  
207 seq cell's marker expression to the mean dissociated cell expression profile. Since these  
208 correlations could potentially be negative, we set quality scores to a minimum of 0.1. A  
209 convenient feature of this quality score is that it yields low correlations for samples with  
210 relatively high contamination as well as those where contamination is largely undetected but  
211 expression of endogenous "on" markers is also low (Supplement Figure 3).

212  
213 *Analysis of factors influencing the numbers of genes detected per cell*

214  
215 We analyzed how the following factors influenced the numbers of genes detected per cell:  
216 library size, defined as the total numbers of reads sequenced per cell; spike-in ratio, defined as  
217 the number of reads mapping to ERCC spike-ins divided by total sequenced reads; the  
218 unmapped ratio, defined as the ratio of reads not mapping to the exonic reference divided by all  
219 non-ERCC sequenced reads; and cellular contamination indices, as defined in the previous  
220 section. For the Cadwell, Tasic, and ERCC-containing subsets of the Földy, and Bardy  
221 datasets, we fit a linear model (implemented using the 'lm' function in R) for numbers of  
222 detected genes per each cell as follows:

223  
224  $\text{num\_genes} \sim \log_{10}(\text{library\_size}) + \text{spike-in\_ratio} + \text{unmapped\_ratio} + \text{contam\_index}$

225  
226 where each term above was first scaled to z-scores, yielding standardized beta coefficients.

227  
228 *Combined analysis of transcriptomic and electrophysiological features*

229  
230 We analyzed correlations between transcriptomic and electrophysiological features using an  
231 approach similar to our previous work (Tripathy et al., 2017). For each patch-seq dataset, we  
232 first filtered for genes whose average expression was > 30<sup>th</sup> percentile relative to all genes in  
233 the dataset. We analyzed electrophysiological features overlapping with our previous analysis,  
234 specifically, input resistance (*R<sub>in</sub>*), resting membrane potential (*V<sub>rest</sub>*), action potential threshold  
235 (*AP<sub>thr</sub>*), action potential amplitude (*AP<sub>amp</sub>*), action potential half-width (*AP<sub>hw</sub>*), membrane  
236 time constant (*Tau*), after-hyperpolarization amplitude (*AHP<sub>amp</sub>*), rheobase (*Rheo*), maximum  
237 firing rate (*FR<sub>max</sub>*), and capacitance (*C<sub>m</sub>*). We calculated Pearson correlations between the set  
238 of electrophysiology features and gene expression values, both without weighting cells by their  
239 overall quality scores (based on correlation of markers to dissociated cell samples), and after  
240 weighting cells using their quality scores.

241  
242 We performed an analogous analysis for comparison of pooled-cell correlations based on the  
243 AIBS/Tasic dataset, where we computationally merged different groups of cells characterized  
244 using dissociated cell scRNAseq (based on Tasic et al, (Tasic et al., 2016)) with cells  
245 characterized using patch-clamp electrophysiology (Teeter et al., 2018) based on the overlap of  
246 same mouse transgenic lines and coarse cortical layers (i.e., upper vs lower mouse visual  
247 cortex). For example, we merged 14 QC-passing scRNAseq samples from the *Sst-IRES-cre*  
248 mouse line from visual cortex dissections specific to lower layers with 89 patch-clamp samples

249 from the same mouse line from cortical layers 4 through 6b. After merging single-cells into cell  
250 types, we averaged expression and electrophysiological values; since cell types tended to be  
251 represented by differing numbers of cells, in our gene-electrophysiology correlation analyses we  
252 weighted cell types based on the numbers of cells available using the square root of the  
253 harmonic mean of the number of cells characterized by electrophysiology and  
254 electrophysiology.

#### 255 *Statistical information*

257 We used the R weights toolbox (v0.85) to calculate weighted Pearson correlations and raw p-  
258 values. We used the Benjamini-Hochberg False Discovery Rate (FDR) to account for analysis of  
259 multiple correlations.

#### 260 *Computer code and data availability*

262 All computational code and associated data has been made accessible at  
263 <https://github.com/PavlidisLab/patchSeqQC> and code for the RNAseq pipeline is accessible at  
264 <https://github.com/PavlidisLab/maseq-pipeline>.

## 265 **Results**

269 To quantitatively assess the influence of patch-seq specific technical confounds, we performed  
270 a re-analysis of four recently published patch-seq datasets. We focused our analyses on three  
271 datasets obtained from mouse acute brain slices (Cadwell et al., 2015; Földy et al., 2016; Fuzik  
272 et al., 2016) and contrast these against one dataset obtained from human stem-cell derived  
273 neurons and astrocytes in culture (Bardy et al., 2016) (Table 1).

| <b>Dataset</b>                 | <b>Description</b>                                                                       | <b>Preparation</b>                    | <b>RNA amplification</b>                   | <b>Number of cells</b> | <b>Accession</b> |
|--------------------------------|------------------------------------------------------------------------------------------|---------------------------------------|--------------------------------------------|------------------------|------------------|
| Cadwell (Cadwell et al., 2015) | Cortical layer 1 interneurons                                                            | Acute mouse slices                    | Smart-seq2                                 | 58                     | E-MTAB-4092      |
| Fuzik (Fuzik et al., 2016)     | Cortical layer 1/2 interneurons and pyramidal cells                                      | Acute mouse slices                    | STRT-C1 (with unique molecule identifiers) | 80                     | GSE70844         |
| Földy (Földy et al., 2016)     | Hippocampal CA1 and Subiculum pyramidal cells and regular- and fast-spiking interneurons | Acute mouse slices                    | SMARTer                                    | 93                     | GSE75386         |
| Bardy (Bardy et al., 2016)     | Stem-cell derived neurons and astrocytes                                                 | Differentiated human cells in culture | SMARTer                                    | 56                     | NA*              |

276 *Table 1: Description of patch-seq datasets re-analyzed in this study. \*Expression data obtained by contacting the authors*  
277 *directly.*

#### 278 *Expression of off-target cell type marker genes in patch-seq samples*

279

280 We first assessed if patch-seq based single-cell transcriptomes might have been contaminated  
281 by mRNA from other cells adjacent to the patched cell (Figure 1A, B), termed off-target cell-type  
282 contamination (Okaty et al., 2011). For example, is there paradoxical expression of genes  
283 specific to microglia in the scRNAseq profile of a recorded pyramidal cell? To address this  
284 question, we made use of the fact that the broad identities of the recorded cells can be  
285 ascertained from morphological and electrophysiological features without relying on the  
286 transcriptomic data (see Methods). Furthermore, we used multiple mouse forebrain scRNAseq  
287 datasets collected from dissociated cells to define lists of marker genes specific to various  
288 cortical and hippocampal cell types (Supplementary Table 4) (Mancarci et al., 2017; Tasic et al.,  
289 2016; Zeisel et al., 2015).

290  
291 We detected that some of the single cell samples from the three mouse datasets collected from  
292 acute brain slices expressed markers for multiple distinct cell types (Figure 1, Supplement  
293 Figure 1). For example, some of the cortical layer 1 elongated neurogliaform cells (eNGCs)  
294 characterized in the Cadwell dataset appeared to also express multiple marker genes specific to  
295 pyramidal cells (Figure 1C), such as *Slc17a7*, the vesicular glutamatergic transporter VGLUT1.  
296 Similarly, many of the cells identified as hippocampal regular spiking GABAergic interneurons in  
297 the Földy dataset also expressed microglial and pyramidal cell markers (Figure 1H).

298  
299 We sought to quantify the extent of off-target cell type contamination in the mouse patch-seq  
300 samples. We directly compared the patch-seq-based expression profiles to cellular dissociation-  
301 based transcriptomes from two recent surveys of mouse cortical diversity from Tasic et al. and  
302 Zeisel et al. (Tasic et al., 2016; Zeisel et al., 2015). After matching cell type identities across  
303 studies (shown in Supplementary Table 2), we found that compared to dissociated cells, patch-  
304 seq-based samples expressed markers for multiple cell types at considerably higher levels  
305 (Figure 1C, H, J; Supplement Figure 2A, B). We defined a simple contamination index,  
306 providing a scalar value for greater than expected off-target cell type marker expression across  
307 multiple classes of broad cell types, by comparison to analogous cells from the dissociated-cell  
308 reference (see Methods). Importantly, patch-seq-based samples with larger contamination  
309 indices also expressed markers of their own cell type at lower levels (Supplement Figure 3).  
310 We note that we saw less off-target cell type marker expression in the Fuzik dataset relative to  
311 the Cadwell and Földy datasets (Supplement Figure 2), suggesting either less contamination  
312 in these cells or that the lower gene detection rate in this dataset (Figure 3B) obscures our  
313 ability to use expression profiles to identify cellular contamination.

314

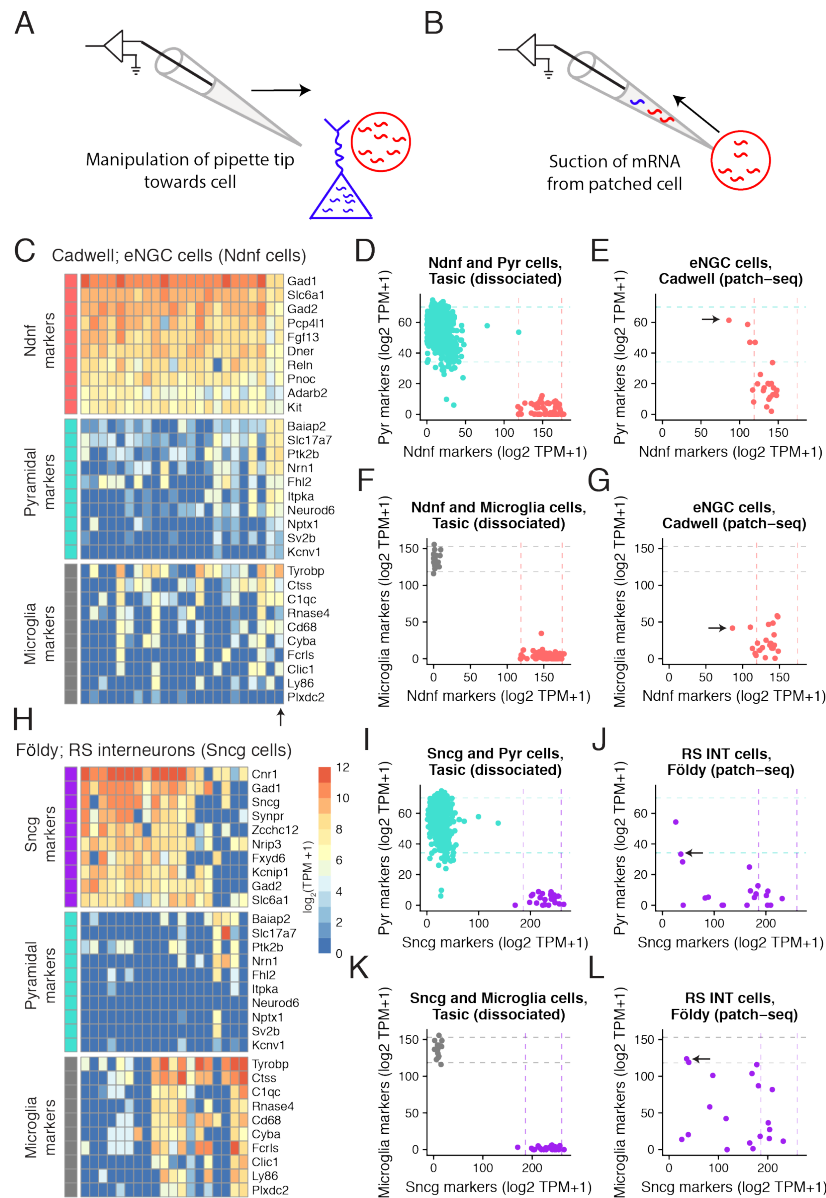

315  
 316 *Figure 1: Expression of cell type-specific marker genes in mouse single-cell samples collected using patch-seq. A, B)*  
 317 *Schematic illustrating manipulation of patch-pipette towards cell of interest (A) and aspiration of cellular mRNA into*  
 318 *the patch-pipette (B). C) Gene expression profiles for GABAergic elongated neurogliaform cells (eNGCs, similar to*  
 319 *layer 1 Ndnf cellular subtype) for various cell type-specific markers. Each column reflects a single-cell sample. D)*  
 320 *Summed expression of cell type-specific marker genes for Pyramidal cell (y-axis) and Layer 1 Ndnf cell (x-axis)*  
 321 *markers. Dots reflect Pyramidal (turquoise) and Ndnf (red) single cells collected in Tasic dataset, based on*  
 322 *dissociated scRNAseq. Dashed lines reflect 95% intervals of marker expression for each cell type. E) Same as D, but*  
 323 *showing summed marker expression for eNGC cells shown in A based on patch-seq data. Arrow shows single-cell*  
 324 *marked in C. F, G) Same as D and E, but for microglial cell markers. H-L) Same as C-G, but for hippocampal*  
 325 *GABAergic regular spiking interneurons (RS INT cells, similar to Sncg cells from in Tasic) characterized in Földy*  
 326 *dataset.*

327 We next assessed the degree of off-target cell type contamination in the Bardy patch-seq  
 328 dataset of human stem-cell derived neurons and astrocytes obtained from cultured cells (Bardy  
 329 et al., 2016). Since the cells in this dataset were cultured relatively sparsely, allowing the  
 330 processes of each cultured cell to be easily visualized (personal communication with Cedric  
 331 Bardy), we wondered if this dataset would show less off-target cell type marker expression



332 compared to the three mouse acute brain slice datasets. Indeed, when assessing astrocyte  
 333 marker expression in the population of electrophysiologically-mature neurons (with markers  
 334 based on purified human cells (Zhang et al., 2016)), we found these neurons showed some, but  
 335 overall very little, expression of astrocyte markers relative to the mature astrocytes also profiled  
 336 in this dataset (Figure 2A, B). In addition, both neurons and astrocytes showed almost no  
 337 expression of microglia markers (Figure 2A), perhaps unsurprisingly, since microglial cells are  
 338 not present in these cultures (Bardy et al., 2016). This example provides suggestive evidence  
 339 that the density of processes of adjacent cells might contribute to off-target mRNA  
 340 contamination.  
 341

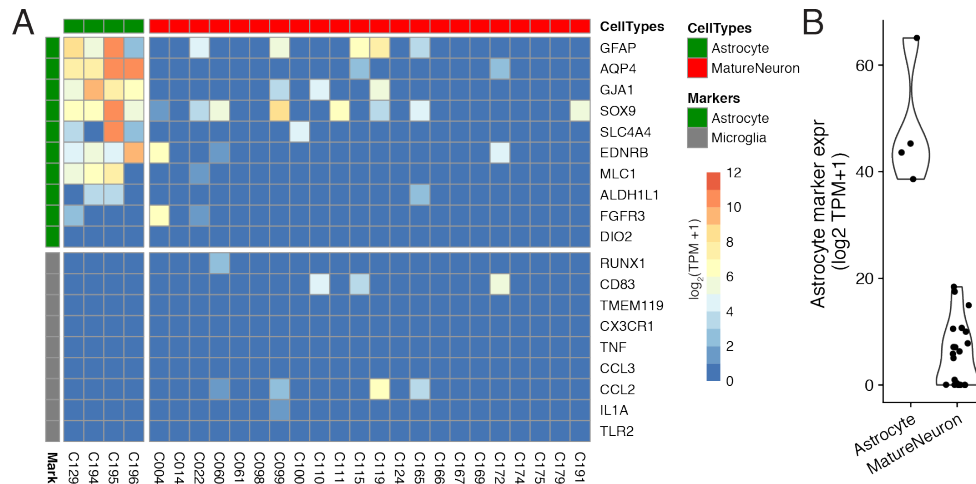

342  
 343 *Figure 2. Expression of cell type-specific marker genes in patch-seq samples obtained from human astrocytes and neurons*  
 344 *differentiated in culture from the Bardy dataset. A) Gene expression profiles for differentiated astrocytes (green) and*  
 345 *electrophysiologically-mature neurons (red) for astrocyte and microglial-specific (grey) marker genes. Each column*  
 346 *reflects a single-cell sample. Two astrocyte cells were removed because they expressed fewer than 3 astrocyte*  
 347 *markers. B) Summed astrocyte marker expression for astrocyte and mature neuron single-cells, for the same cells*  
 348 *shown in part A.*

### 349 *Technical factors strongly influence the numbers of genes detected per cell*

350  
 351 Next, we wondered if there are identifiable technical factors that can help explain the large  
 352 ranges in the numbers of genes detected per cell in each dataset, from 6000-13000 genes/cell  
 353 in Cadwell to 800-7000 genes/cell in Fuzik (Figure 3B). Because patch-seq mRNA collection  
 354 requires the experimenter to manually aspirate cellular mRNA into the patch-pipette, we  
 355 reasoned that mRNA harvesting would be difficult to consistently control from cell to cell, leading  
 356 there to be different amounts of extracted mRNA per cell. To estimate how much cellular mRNA  
 357 was extracted per cell, we made use of ERCC spike-ins (Tasic et al., 2017), which are synthetic  
 358 control mRNAs that are added to single-cell samples prior to library preparation and sequencing  
 359 (Figure 3A). Specifically, since the same amount of ERCC spike-in mRNAs are added to each  
 360 sample, we can use the ratio of spike-in reads to the total count of sequenced reads to estimate  
 361 the relative amount of extracted mRNA per cell (Lun et al., 2017; Vallejos et al., 2017). Here,  
 362 every cell in the Cadwell and Tasic datasets and a subset of cells in the Földy and Bardy  
 363 datasets contained ERCC spike-ins.

364  
 365 We used a multivariate regression approach to ask how various technical factors contribute to  
 366 the numbers of genes detected per cell in the Cadwell, Földy, and Bardy patch-seq datasets  
 367 and the Ndnf cell subset of the Tasic dissociated-cell dataset (Figure 3C; the Fuzik dataset did

368 not include spike-ins). Library size (the number of sequenced reads per cell) was positively  
 369 correlated with detected gene counts in the Tasic and Cadwell datasets (Figure 3C, D).  
 370 Similarly, cells with a larger ratio of spike-in reads to total sequenced reads (i.e., with lower  
 371 initial amounts of cellular mRNA; Figure 3A), had lower numbers of detected genes across all of  
 372 the datasets (Figure 3D), pointing to the importance of mRNA extraction efficiency. In addition,  
 373 we saw considerably greater ranges in the spike-in ratio in the patch-seq datasets relative to the  
 374 Tasic dataset (Cadwell: 3-17%, Bardy: 3-37%, Tasic: .4-4%).

375  
 376 Next, we reasoned that though many mRNA transcripts might be extracted from a cell, not all of  
 377 these would be sufficiently high quality to map to the reference (e.g., they might reflect  
 378 degraded mRNAs (Cadwell et al., 2017b, 2017a), other contaminants, etc.). To account for this  
 379 possibility, we calculated the ratio of unmapped to mapped reads, after excluding reads  
 380 mapping to spike-ins. Cells with very large ratios of unmapped to mapped reads had fewer  
 381 genes detected (Figure 3C). This technical factor was especially important in the Földy and  
 382 Bardy datasets, with some cells in the Földy dataset having fewer than 10% of reads mapped to  
 383 the transcriptome (Figure 3G). Lastly, we further wondered if cells showing greater amounts of  
 384 off-target cell type contamination would also have a greater number of detected genes. We  
 385 found that cells with greater contamination indices from the Cadwell and Földy datasets (i.e., the  
 386 acute slice-based patch-seq datasets) had more genes detected, consistent with previous  
 387 reports (Ilicic et al., 2016; Vallejos et al., 2017). In total, these simple technical factors explain  
 388 between 50-85% of the cell-to-cell variance in the detected gene counts per patch-seq datasets  
 389 (Figure 3I).

390

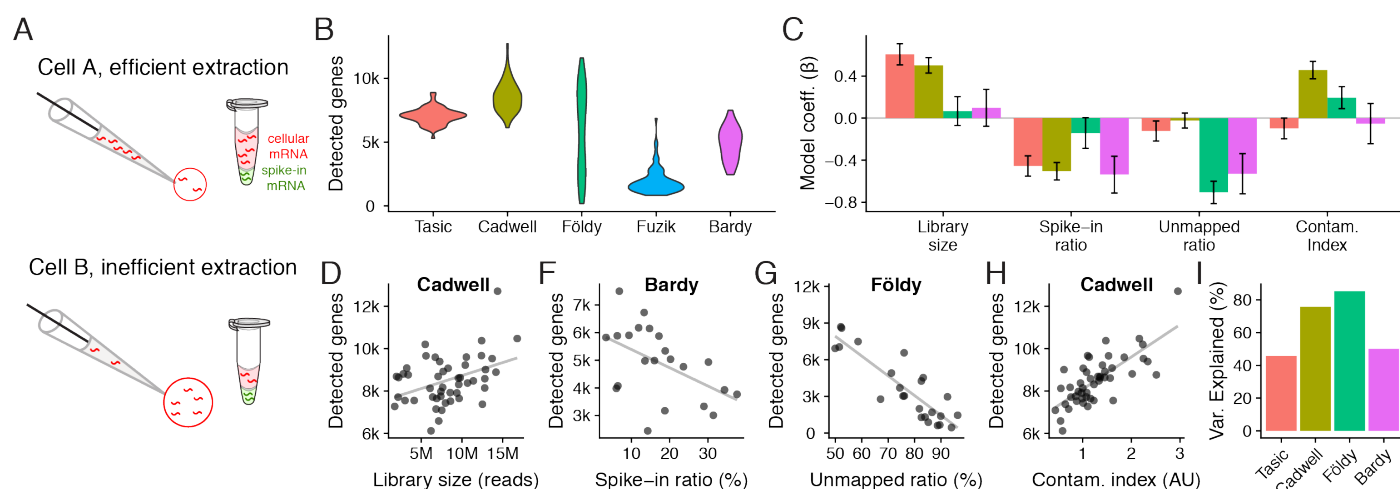

391  
 392  
 393 *Figure 3. Patch-seq experimental confounds affect the numbers of genes detected per cell. A) Schematic illustrating*  
 394 *how spike-in mRNAs can be used to estimate how much mRNA was extracted per cell. B) Violin plots showing*  
 395 *numbers of protein-coding genes detected per cell across patch-seq datasets or the Ndnf subset of the Tasic*  
 396 *dissociated-cell dataset. C) Technical factors associated with numbers of genes detected per cell across datasets*  
 397 *(dataset color shown in B). Bars show standardized beta model coefficients with y-axis in units of standard*  
 398 *deviations, allowing comparison of effects across factors and across datasets. Error bars indicate coefficient standard*  
 399 *deviations. Positive (negative) coefficients indicate factor is correlated with increased (decreased) gene counts.*  
 400 *Regression models calculated using only cells containing mRNA spike-ins. D-H) Examples of univariate relationships*  
 401 *between technical factors and detected gene count per cell (dots) across patch-seq datasets. Grey line shows best fit*  
 402 *line. D) Library size (count of sequenced reads per cell). F) Spike-ins as a fraction of all sequenced reads per cell.*  
 403 *Samples with lower cellular mRNA content (indicated by higher spike-in ratios) have lower gene counts. G)*  
 404 *Unmapped ratio, calculated as the ratio of exonic reads to all other reads (excluding spike-ins). H) Cellular*  
 405 *contamination index, quantified by summing normalized contamination values across tested cell types (arbitrary*  
 406 *units). I) Overall percent variance explained by each dataset-specific statistical model shown in E.*

406 *Accounting for technical factors improves the correspondence with electrophysiological features*  
 407

408 Lastly, we performed an integrated analysis of gene expression and electrophysiological  
 409 features for the 3 mouse-based patch-seq datasets, reasoning that more lower quality patch-  
 410 seq samples would be less informative of relationships between cellular electrophysiology and  
 411 gene expression (Tripathy et al., 2017). We first calculated a quality score for each patch-seq  
 412 sample, based on the similarity of its marker expression to dissociated cells of its same type  
 413 (see Methods; Supplement Figure 3). After statistically down-weighting lower quality cells, we  
 414 observed a modest improvement in the correspondence between gene expression and  
 415 electrophysiology, as evidenced by an increase in the number of genes significantly correlated  
 416 with electrophysiological features (FDR < 0.1, Figure 4A, B). In addition, after correction, we  
 417 found more genes overlapping with those identified in our previous gene-electrophysiology  
 418 correlation analysis based on pooled cell types (Tripathy et al., 2017) (Figure 4C). While the  
 419 biological implications of these correlations require further investigation, this analysis suggests  
 420 that controlling for these technical factors can help improve the interpretability of patch-seq data.  
 421

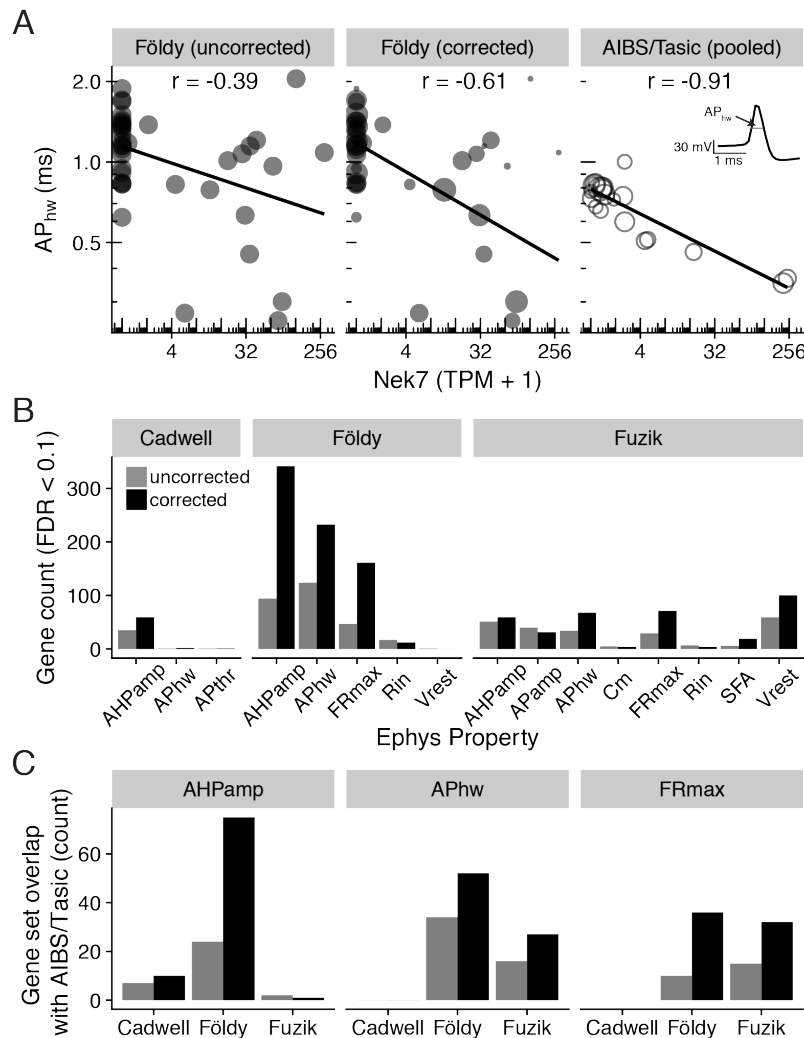

422 *Figure 4. Adjusting for patch-seq experimental confounds improves the correspondence with electrophysiological*  
 423 *measures. A) Comparison of gene expression (Nek7; x-axis) with electrophysiological features (action potential half-*  
 424 *width; AP<sub>hwh</sub>; y-axis). Left panel shows single-cell samples (circles) from the Földy dataset. Middle panel shows same*  
 425 *data as left, but size of circles proportional to each sample's quality score, defined as the similarity of marker*  
 426

427 *expression to dissociated cell-based reference data. Right panel shows cell type-level analysis based on pooled cell*  
428 *type data from Allen Institute cell types database (AIBS/Tasic), where scRNAseq and electrophysiology were*  
429 *performed on different cells from same type (Tripathy et al., 2017). Each open circle reflects one cell type and circle*  
430 *size is proportional to the number of cells representing each cell type. Inset illustrates calculation of action potential*  
431 *half-width (schematic). B) Count of genes significantly correlated (FDR < 0.1) with various electrophysiological*  
432 *properties before (grey) and after (black) correcting for contamination. C) Comparison of genes significantly*  
433 *correlated (BH FDR < 0.1) with electrophysiological features based on patch-seq data with analogous correlations*  
434 *based on AIBS/Tasic dataset, pooled to the level of cell types based on cre-lines. Bars indicate count of overlapping*  
435 *genes between patch-seq and AIBS/Tasic pooled-cell data without correcting for contamination and with correction.*  
436 *No maximum firing rate (FR<sub>max</sub>) electrophysiological features were originally calculated for cells in the Cadwell*  
437 *dataset.*

## 438 **Discussion**

439  
440 The patch-seq technique reflects a considerable leap in our ability to interrogate a neuron  
441 across multiple features of its activity. However, across our analyses of multiple patch-seq  
442 datasets, we noticed several technical issues that appeared to be shared across experiments.  
443 First, in the three mouse datasets collected from acute brain slices (Cadwell et al., 2015; Földy  
444 et al., 2016; Fuzik et al., 2016), we observed that many single cell samples appeared to strongly  
445 express marker genes from off-target cell types. We interpret this as mRNA contamination from  
446 cells adjacent to the recorded cell, but note that there are alternative explanations. Second, we  
447 observed that mRNA extraction efficiency differs between sampled cells, leading to varying  
448 numbers of genes detected even among cells of the same broad type. These technical artifacts  
449 can be mitigated in part through post hoc analyses, such as our attempt to weight single-cells by  
450 the similarity of their marker gene expression to analogous dissociated cells of the same broad  
451 cell type.

452  
453 To detect off-target cell type contamination, our main approach was to compare patch-seq  
454 based single-cell transcriptomes to dissociated-cell based reference scRNAseq data from  
455 similar cell types. We used these reference data to identify cell type-specific marker genes as  
456 well as to determine approximately how much off-target marker expression would be expected  
457 in each cell type. We note that there are obvious methodological differences between  
458 dissociated-cell scRNAseq and patch-seq (Cadwell et al., 2017b, 2017a), such as the strain  
459 induced by dissociating cells (Wu et al., 2017) or that patch-seq might be more likely to sample  
460 transcripts from distal cellular processes. Thus we cannot conclusively rule out that some of the  
461 off-target cell type marker expression might reflect a true biological signal, as opposed to mRNA  
462 contamination from adjacent cells. However, we note that the use of marker genes to identify  
463 suspected off-target contamination is a routine quality control step in cell type-specific gene  
464 expression analyses (Mancarci et al., 2017; Okaty et al., 2011), including recent methods for  
465 identifying suspected “doublets” or multi-cell contamination in droplet-based scRNAseq (Zeisel  
466 et al., 2018).

467  
468 We speculate that the sources of off-target contamination are the processes of cells adjacent to  
469 the patch-pipette. For example, while there are relatively few cell bodies in layer 1 of the  
470 neocortex, there are processes of other cell types like pyramidal cells, and it is well established  
471 that these processes contain mRNA transcripts (Glock et al., 2017). In addition, we noticed that  
472 we routinely observed expression of microglial markers in the mouse patch-seq samples. This is  
473 interesting because the presence of even 1 mM ATP in the patch-pipette is sufficient to induce  
474 rapid chemotaxis of microglial processes towards the pipette (Madry et al., 2018). Patch-clamp  
475 intracellular solutions usually use 2 or 4 mM ATP (Tebaykin et al., 2017), including those of the  
476 patch-seq datasets here (Bardy et al., 2016; Cadwell et al., 2015; Földy et al., 2016; Fuzik et al.,  
477 2016). At present, it is unclear whether this suspected off-target contamination might occur  
478 while the pipette is actively manipulated under positive pressure towards the recorded cell.

479 Alternatively, such contamination might take place following mRNA extraction during the  
480 retraction of the pipette from the neuropil and recording chamber. Assuming that neuropil is the  
481 major source of off-target contamination, this suggests that there may be advantages to  
482 performing patch-seq on sparsely cultured or acutely dissociated cells (Bardy et al., 2016;  
483 Kodama et al., 2012; Schulz et al., 2006).

484  
485 Our analyses identified several technical factors that influence the numbers of genes detected  
486 per cell. First, to obtain a sufficient number of detected genes, it is essential to extract a large  
487 amount of mRNA from the targeted cell. However, this itself is not sufficient, as other factors,  
488 such as mRNA degradation can lead the extracted transcripts being too low quality to map to  
489 the genomic reference (Cadwell et al., 2017b, 2017a). Second, given sufficient extraction of  
490 non-degraded transcripts, because of the extremely high sensitivity of modern ultra-low mRNA  
491 capture kits (Poulin et al., 2016; Tasic et al., 2017), any off-target cell-type contamination will  
492 inflate the numbers of genes detected per cell. This suggests that the detected gene count,  
493 often used as a proxy for the quality of scRNAseq data, should not be the only quality control  
494 metric for single-cell transcriptomes sampled using patch-seq.

495  
496 The effect of these technical confounds on downstream analyses of patch-seq data is likely  
497 context specific. For example, the presence of a small degree of off-target contamination is  
498 likely to be of little consequence if the patch-seq data is used as a “Rosetta stone”, to help  
499 connect cellular classifications based on different methodologies, such as transcriptomically-  
500 defined cell clusters with electrophysiological clusters (Fuzik et al., 2016; Tasic, 2018).  
501 However, accurately quantifying single-cell transcriptomes is likely to be much more important  
502 when using these data to investigate how transcriptomic heterogeneity gives rise to subtle cell  
503 to cell variability in physiological features (Cadwell et al., 2015; Schulz et al., 2006; Tripathy et  
504 al., 2017).

505  
506 Our analyses point to quality control steps that can improve the yield of high-quality patch-seq  
507 samples. An advantage of patch-seq over traditional dissociated-cell based scRNA-seq is that a  
508 cell’s electrophysiological and morphological features are often sufficient to determine its broad  
509 cell type (Cadwell et al., 2015; Földy et al., 2016; Fuzik et al., 2016). We argue that knowing a  
510 cell’s broad type can help quality control its sampled transcriptome: the cell should express  
511 marker genes of its own type, including highly expressed markers as well as more lowly  
512 expressed markers, such as some transcription factors and long non-coding RNAs (Mancarci et  
513 al., 2017). In addition, the cell should not express marker genes specific to other cell types. This  
514 quality control step can be performed following RNAseq, as we pursue here. However, this  
515 quality control could also be performed after library preparation and amplification but prior to  
516 costly sequencing, for example, using qPCR to detect the expression of a small number of  
517 expected and unexpected marker genes (Bardy et al., 2016).

518  
519 To summarize, though patch-seq provides a powerful method for multi-modal neuronal  
520 characterization (Bardy et al., 2016; Cadwell et al., 2017b; Földy et al., 2016; Fuzik et al., 2016),  
521 it is susceptible to a number of methodology-specific technical artifacts, such as an increased  
522 likelihood of mRNA contamination from adjacent cells. These artifacts strongly bias traditional  
523 scRNAseq quality metrics such as the numbers of genes detected per cell. By leveraging high-  
524 quality reference atlases of single-cell transcriptomic diversity (Tasic et al., 2016; Zeisel et al.,  
525 2015), we argue that inspection of cell type-specific marker expression should be an essential  
526 patch-seq quality control step prior to downstream analyses.

## 527 **Acknowledgements**

529

530 We thank Cathryn Cadwell, Janos Fuzik, Csaba Földy, and Cedric Bardy for sharing data and  
531 Jim Berg, Dmitry Kobak, and Philipp Berens for helpful discussions. This work was supported by  
532 Kids Brain Health Network, a Canadian Institute for Health Research Post-doctoral Fellowship,  
533 and NIH grant MH111099.

534

#### 535 **Author contributions**

536

537 SJT and PP conceived the project. SJT implemented the methodology and generated the  
538 results with assistance from LT, OBM, CB and MB. All authors contributed to interpreting the  
539 results. SJT and PP wrote the paper with assistance from all authors.

540

#### 541 **Competing interests**

542

543 The authors declare no competing financial interests.

544

545

#### 546 **References**

547

548 Bardy, C., van den Hurk, M., Kakaradov, B., Erwin, J. A., Jaeger, B. N., Hernandez, R. V., et al.  
549 (2016). Predicting the functional states of human iPSC-derived neurons with single-cell  
550 RNA-seq and electrophysiology. *Mol. Psychiatry*. doi:10.1038/mp.2016.158.

551 Cadwell, C. R., Palasantza, A., Jiang, X., Berens, P., Deng, Q., Yilmaz, M., et al. (2015).

552 Electrophysiological, transcriptomic and morphologic profiling of single neurons using  
553 Patch-seq. *Nat. Biotechnol.* doi:10.1038/nbt.3445.

554 Cadwell, C. R., Sandberg, R., Jiang, X., and Tolias, A. S. (2017a). Q&A: using Patch-seq to  
555 profile single cells. *BMC Biol.* 15, 58. doi:10.1186/s12915-017-0396-0.

556 Cadwell, C. R., Scala, F., Li, S., Livrizzi, G., Shen, S., Sandberg, R., et al. (2017b). Multimodal  
557 profiling of single-cell morphology, electrophysiology, and gene expression using Patch-  
558 seq. *Nat. Protoc.* 12, nprot.2017.120. doi:10.1038/nprot.2017.120.

559 Cauli, B., Audinat, E., Lambolez, B., Angulo, M. C., Ropert, N., Tsuzuki, K., et al. (1997).

560 Molecular and Physiological Diversity of Cortical Nonpyramidal Cells. *J. Neurosci.* 17,  
561 3894–3906.

562 Crow, M., Paul, A., Ballouz, S., Huang, Z. J., and Gillis, J. (2018). Characterizing the

563 replicability of cell types defined by single cell RNA-sequencing data using  
564 MetaNeighbor. *Nat. Commun.* 9, 884. doi:10.1038/s41467-018-03282-0.

565 Dobin, A., Davis, C. A., Schlesinger, F., Drenkow, J., Zaleski, C., Jha, S., et al. (2013). STAR:

566 ultrafast universal RNA-seq aligner. *Bioinforma. Oxf. Engl.* 29, 15–21.  
567 doi:10.1093/bioinformatics/bts635.

568 Eberwine, J., Yeh, H., Miyashiro, K., Cao, Y., Nair, S., Finnell, R., et al. (1992). Analysis of

569 gene expression in single live neurons. *Proc. Natl. Acad. Sci.* 89, 3010–3014.  
570 doi:10.1073/pnas.89.7.3010.

- 571 Földy, C., Darmanis, S., Aoto, J., Malenka, R. C., Quake, S. R., and Südhof, T. C. (2016).  
572 Single-cell RNAseq reveals cell adhesion molecule profiles in electrophysiologically  
573 defined neurons. *Proc. Natl. Acad. Sci.* 113, E5222–E5231.  
574 doi:10.1073/pnas.1610155113.
- 575 Fuzik, J., Zeisel, A., Máté, Z., Calvigioni, D., Yanagawa, Y., Szabó, G., et al. (2016). Integration  
576 of electrophysiological recordings with single-cell RNA-seq data identifies neuronal  
577 subtypes. *Nat. Biotechnol.* 34, 175–183. doi:10.1038/nbt.3443.
- 578 Glock, C., Heumüller, M., and Schuman, E. M. (2017). mRNA transport & local translation in  
579 neurons. *Curr. Opin. Neurobiol.* 45, 169–177. doi:10.1016/j.conb.2017.05.005.
- 580 Ilicic, T., Kim, J. K., Kolodziejczyk, A. A., Bagger, F. O., McCarthy, D. J., Marioni, J. C., et al.  
581 (2016). Classification of low quality cells from single-cell RNA-seq data. *Genome Biol.*  
582 17, 29. doi:10.1186/s13059-016-0888-1.
- 583 Kodama, T., Guerrero, S., Shin, M., Moghadam, S., Faulstich, M., and Lac, S. du (2012).  
584 Neuronal Classification and Marker Gene Identification via Single-Cell Expression  
585 Profiling of Brainstem Vestibular Neurons Subserving Cerebellar Learning. *J. Neurosci.*  
586 32, 7819–7831. doi:10.1523/JNEUROSCI.0543-12.2012.
- 587 Li, B., and Dewey, C. N. (2011). RSEM: accurate transcript quantification from RNA-Seq data  
588 with or without a reference genome. *BMC Bioinformatics* 12, 323. doi:10.1186/1471-  
589 2105-12-323.
- 590 Lun, A. T. L., Calero-Nieto, F. J., Haim-Vilmovsky, L., Göttgens, B., and Marioni, J. C. (2017).  
591 Assessing the reliability of spike-in normalization for analyses of single-cell RNA  
592 sequencing data. *Genome Res.* doi:10.1101/gr.222877.117.
- 593 Madry, C., Kyrargyri, V., Arancibia-Cárcamo, I. L., Jolivet, R., Kohsaka, S., Bryan, R. M., et al.  
594 (2018). Microglial Ramification, Surveillance, and Interleukin-1 $\beta$  Release Are Regulated  
595 by the Two-Pore Domain K<sup>+</sup> Channel THIK-1. *Neuron* 97, 299-312.e6.  
596 doi:10.1016/j.neuron.2017.12.002.
- 597 Mancarci, B. O., Toker, L., Tripathy, S. J., Li, B., Rocco, B., Sibille, E., et al. (2017). Cross-  
598 Laboratory Analysis of Brain Cell Type Transcriptomes with Applications to  
599 Interpretation of Bulk Tissue Data. *eNeuro*, ENEURO.0212-17.2017.  
600 doi:10.1523/ENEURO.0212-17.2017.
- 601 Okaty, B. W., Sugino, K., and Nelson, S. B. (2011). A Quantitative Comparison of Cell-Type-  
602 Specific Microarray Gene Expression Profiling Methods in the Mouse Brain. *PLoS ONE*  
603 6, e16493. doi:10.1371/journal.pone.0016493.
- 604 Poulin, J.-F., Tasic, B., Hjerling-Leffler, J., Trimarchi, J. M., and Awatramani, R. (2016).  
605 Disentangling neural cell diversity using single-cell transcriptomics. *Nat. Neurosci.* 19,  
606 1131–1141. doi:10.1038/nn.4366.

- 607 Rossier, J., Bernard, A., Cabungcal, J.-H., Perrenoud, Q., Savoye, A., Gallopin, T., et al. (2014).  
608 Cortical fast-spiking parvalbumin interneurons enwrapped in the perineuronal net express  
609 the metallopeptidases Adamts8, Adamts15 and Nephrilysin. *Mol. Psychiatry*.  
610 doi:10.1038/mp.2014.162.
- 611 Schulz, D. J., Goillard, J.-M., and Marder, E. (2006). Variable channel expression in identified  
612 single and electrically coupled neurons in different animals. *Nat. Neurosci.* 9, 356–362.  
613 doi:10.1038/nm1639.
- 614 Subkhankulova, T., Yano, K., Robinson, H. P. C., and Livesey, F. J. (2010). Grouping and  
615 classifying electrophysiologically-defined classes of neocortical neurons by single cell,  
616 whole-genome expression profiling. *Front. Mol. Neurosci.* 3, 10.  
617 doi:10.3389/fnmol.2010.00010.
- 618 Sucher, N. J., and Deitcher, D. L. (1995). PCR and patch-clamp analysis of single neurons.  
619 *Neuron* 14, 1095–1100. doi:10.1016/0896-6273(95)90257-0.
- 620 Tasic, B. (2018). Single cell transcriptomics in neuroscience: cell classification and beyond.  
621 *Curr. Opin. Neurobiol.* 50, 242–249. doi:10.1016/j.conb.2018.04.021.
- 622 Tasic, B., Levi, B. P., and Menon, V. (2017). “Single-Cell Transcriptomic Characterization of  
623 Vertebrate Brain Composition, Development, and Function,” in *Decoding Neural Circuit  
624 Structure and Function* (Springer, Cham), 437–468. doi:10.1007/978-3-319-57363-2\_18.
- 625 Tasic, B., Menon, V., Nguyen, T. N., Kim, T. K., Jarsky, T., Yao, Z., et al. (2016). Adult mouse  
626 cortical cell taxonomy revealed by single cell transcriptomics. *Nat. Neurosci.* 19, 335–  
627 346. doi:10.1038/nn.4216.
- 628 Tebaykin, D., Tripathy, S. J., Binnion, N., Li, B., Gerkin, R. C., and Pavlidis, P. (2017).  
629 Modeling sources of interlaboratory variability in electrophysiological properties of  
630 mammalian neurons. *J. Neurophysiol.* 119, 1329–1339. doi:10.1152/jn.00604.2017.
- 631 Teeter, C., Iyer, R., Menon, V., Gouwens, N., Feng, D., Berg, J., et al. (2018). Generalized leaky  
632 integrate-and-fire models classify multiple neuron types. *Nat. Commun.* 9, 709.  
633 doi:10.1038/s41467-017-02717-4.
- 634 Toledo-Rodriguez, M., Blumenfeld, B., Wu, C., Luo, J., Attali, B., Goodman, P., et al. (2004).  
635 Correlation maps allow neuronal electrical properties to be predicted from single-cell  
636 gene expression profiles in rat neocortex. *Cereb. Cortex N. Y. N 1991* 14, 1310–1327.  
637 doi:10.1093/cercor/bhh092.
- 638 Toledo-Rodriguez, M., and Markram, H. (2014). Single-cell RT-PCR, a technique to decipher  
639 the electrical, anatomical, and genetic determinants of neuronal diversity. *Methods Mol.  
640 Biol. Clifton NJ* 1183, 143–158. doi:10.1007/978-1-4939-1096-0\_8.
- 641 Tripathy, S. J., Toker, L., Li, B., Crichlow, C.-L., Tebaykin, D., Mancarci, B. O., et al. (2017).  
642 Transcriptomic correlates of neuron electrophysiological diversity. *PLOS Comput. Biol.*  
643 13, e1005814. doi:10.1371/journal.pcbi.1005814.



- 644 Vallejos, C. A., Risso, D., Scialdone, A., Dudoit, S., and Marioni, J. C. (2017). Normalizing  
645 single-cell RNA sequencing data: challenges and opportunities. *Nat. Methods*.  
646 doi:10.1038/nmeth.4292.
- 647 Wu, Y. E., Pan, L., Zuo, Y., Li, X., and Hong, W. (2017). Detecting Activated Cell Populations  
648 Using Single-Cell RNA-Seq. *Neuron* 96, 313-329.e6. doi:10.1016/j.neuron.2017.09.026.
- 649 Zeisel, A., Hochgerner, H., Lonnerberg, P., Johnsson, A., Memic, F., Zwan, J. van der, et al.  
650 (2018). Molecular architecture of the mouse nervous system. *bioRxiv*, 294918.  
651 doi:10.1101/294918.
- 652 Zeisel, A., Muñoz-Manchado, A. B., Codeluppi, S., Lönnerberg, P., Manno, G. L., Juréus, A., et  
653 al. (2015). Cell types in the mouse cortex and hippocampus revealed by single-cell RNA-  
654 seq. *Science* 347, 1138–1142. doi:10.1126/science.aaa1934.
- 655 Zhang, Y., Sloan, S. A., Clarke, L. E., Caneda, C., Plaza, C. A., Blumenthal, P. D., et al. (2016).  
656 Purification and Characterization of Progenitor and Mature Human Astrocytes Reveals  
657 Transcriptional and Functional Differences with Mouse. *Neuron* 89, 37–53.  
658 doi:10.1016/j.neuron.2015.11.013.
- 659
- 660
- 661

662  
663  
664  
665

## Supplemental Figures

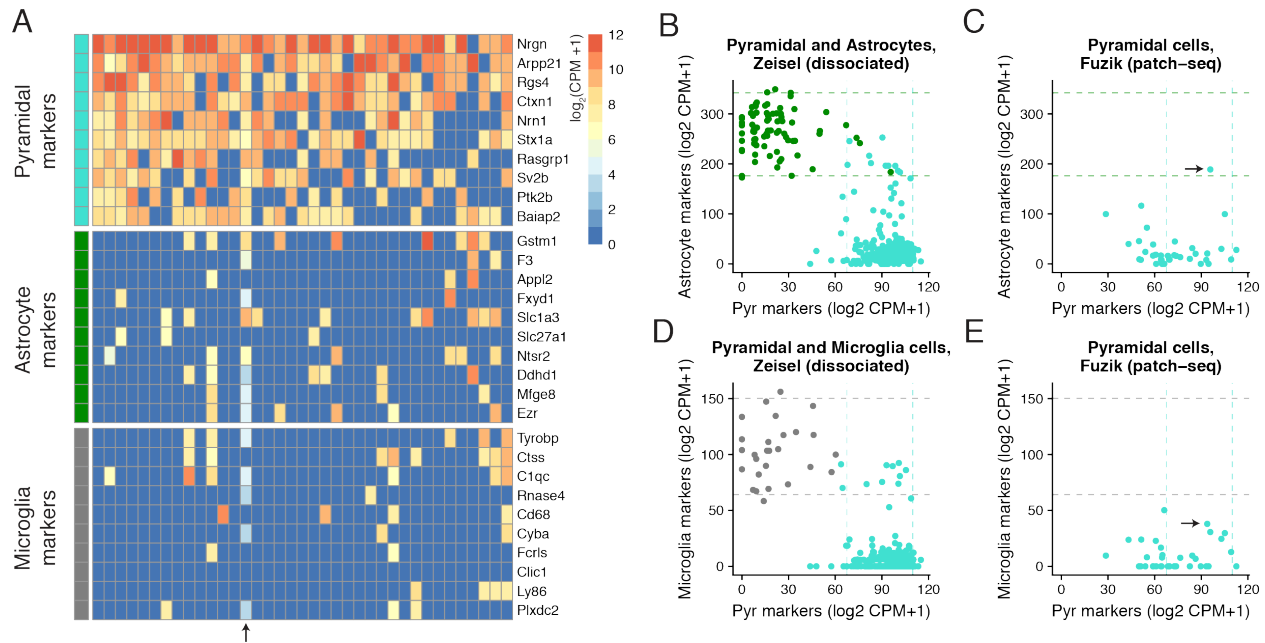

666

667 *Supplement Figure 1. Expression of cell type-specific marker genes in patch-seq samples from Fuzik. A) Gene*  
 668 *expression profiles for sampled pyramidal cells for various cell type-specific markers. B) Summed expression of cell*  
 669 *type-specific marker genes for Pyramidal cell (x-axis) and Astrocyte (y-axis) markers. Dots reflect cortical Pyramidal*  
 670 *cell (turquoise) and Astrocyte (green) single cells collected in the Zeisel dataset, based on dissociated scRNAseq.*  
 671 *Dashed lines reflect 95% intervals of marker expression for each cell type. C) Same as B, but showing summed*  
 672 *marker expression for Pyramidal cells shown in A based on patch-seq data. Arrow denotes the same single-cell*  
 673 *highlighted in A. D,E) Same as B and C, but showing comparison of microglial marker expression.*

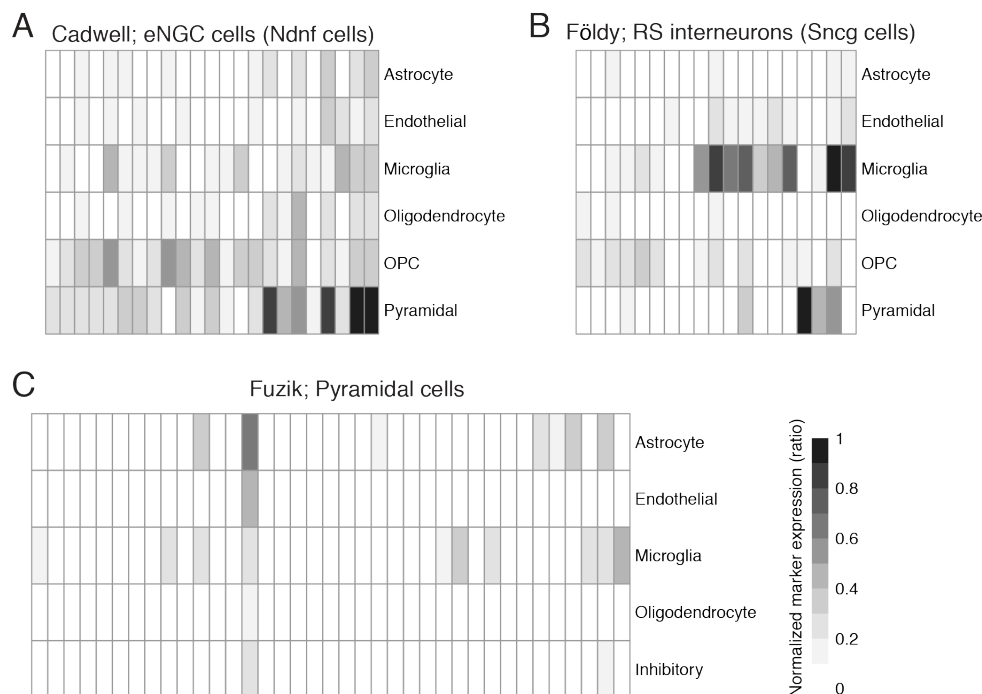

674

675 Supplement Figure 2. Summarized marker gene expression in patch-seq samples for broad cell classes. A) Cortical  
 676 Layer 1 elongated neurogliaform cells (eNGCs) from Cadwell; B) Hippocampus regular spiking (RS) GABAergic  
 677 interneurons from Földy; C) Cortical Pyramidal cells from Fuzik. Each column reflects a single-cell sample and  
 678 columns are sorted as in Figure 1 and Supplement Figure 1. Heatmap colors show cell type-specific marker  
 679 expression, normalized to expected expression based on dissociated cell reference datasets (Tasic, A, B; Zeisel, C).  
 680 0 indicates little-to-no detected off cell-type marker contamination (relative to dissociated cells) and 1 indicates strong  
 681 expression of off-cell-type markers. Oligodendrocyte precursor cells not available in C because this cell type was not  
 682 explicitly annotated in the Zeisel dataset.

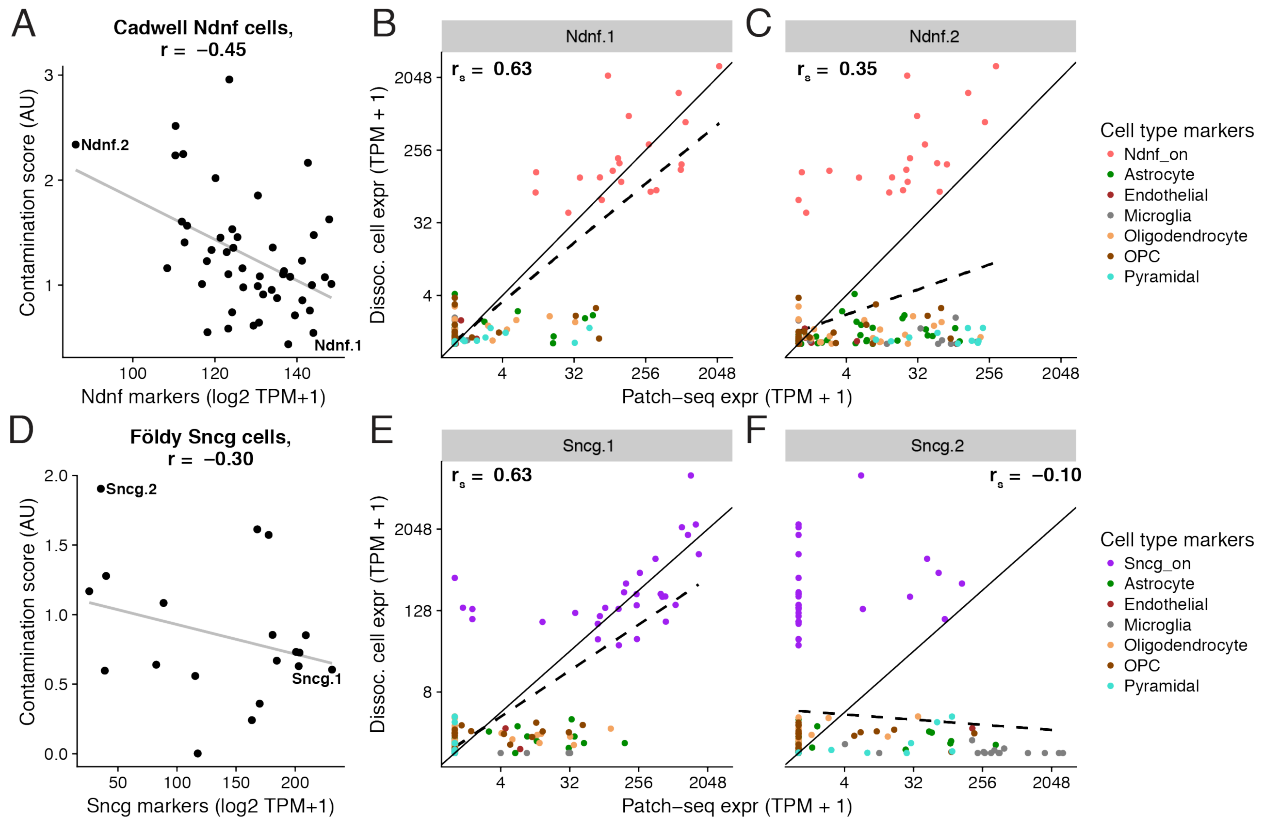

683 Supplement Figure 3. Relationship between inferred contamination and endogenous marker expression. A) Summed  
 684 expression of endogenous “on”-cell type cellular markers (x-axis) versus normalized contamination indices (y-axis,  
 685 summing across normalized contamination values across broad cell types) for individual Ndnf cells from the Cadwell  
 686 dataset (dots). B, C) Examples of “on”- and “off”-cell type marker expression for two single-cell patch-seq samples  
 687 indicated in A. X-axis shows expression of marker genes (dots) in an individual patch-seq sampled cell and y-axis  
 688 shows the average expression of the same markers in Ndnf-type dissociated cells from Tasic. Solid line is unity line,  
 689 dashed line shows best linear fit, and  $r_s$  denotes Spearman correlation between patch-seq and mean dissociated cell  
 690 marker expression. Cell Ndnf.1 (shown in B) illustrates a patch-seq sample with high expression of “on”-type  
 691 endogenous markers and relatively little “off”-cell type marker expression whereas cell Ndnf.2 (shown in C) expresses  
 692 endogenous markers less strongly (relative to dissociated cells of same type) and higher levels “off”-cell type  
 693 marker expression. D-F) Same as A-C, but for hippocampal GABAergic regular spiking interneurons (i.e., Sncg cells)  
 694 characterized in Földy dataset.  
 695

696

697 **Supplementary Tables**

698

699

| <b>Dataset</b>                                   | <b>Experiment type</b>        | <b>Preparation</b> | <b>Description</b>                                    | <b>Accession</b>        | <b>Number of cells</b> |
|--------------------------------------------------|-------------------------------|--------------------|-------------------------------------------------------|-------------------------|------------------------|
| Tasic (Tasic et al., 2016)                       | dissociated cell scRNAseq     | Dissociated cells  | Visual cortex neurons and glia                        | GSE71585                | 1366                   |
| Zeisel (Zeisel et al., 2015)                     | dissociated cell scRNAseq     | Dissociated cells  | Somatosensory cortex and hippocampus neurons and glia | GSE60361                | 3005                   |
| Allen Institute Cell Types (Teeter et al., 2018) | patch-clamp electrophysiology | Acute mouse slices | Visual cortex neurons                                 | celltypes.brain-map.org | 952                    |

700 *Supplementary Table 1: Description of dissociated-cell scRNAseq datasets and patch-clamp*  
 701 *electrophysiological datasets used. For RNA amplification, the Tasic scRNAseq dataset*  
 702 *employed SMARTer (i.e., Smart-seq based, consistent with the Cadwell, Foldy, and Bardy*  
 703 *datasets) whereas the Zeisel dataset employed C1-STRT (consistent with the Fuzik dataset).*

704

| <b>Patch-seq dataset</b> | <b>Cell type (patch-seq)</b>                       | <b>Matched cell type (dissociated cell; Tasic)</b> | <b>Matched cell type (dissociated cell; Zeisel)</b> |
|--------------------------|----------------------------------------------------|----------------------------------------------------|-----------------------------------------------------|
| Cadwell                  | Cortex Layer 1 elongated neurogliaform cell (eNGC) | Ndnf cluster (Ndnf Car4, Ndnf Cxcl14)              | Int12, Int15                                        |
| Cadwell                  | Cortex Layer 1 single bouquet cells (SBC)          | Ndnf cluster (Ndnf Car4, Ndnf Cxcl14)              | Int12, Int15                                        |
| Földy                    | Hippocampus regular-spiking (RS) interneurons      | Sncg                                               | Int 5                                               |
| Földy                    | Hippocampus CA1 and Subiculum Pyramidal cells      | Pyramidal cluster                                  | Pyramidal cluster (excluding CA1PyrInt)             |
| Földy                    | Hippocampus fast-spiking (FS) interneurons         | Pvalb cluster (Pvalb Gpx3, Pvalb Wt1, Pvalb Tacr3, | Int 3                                               |

|       |                                   |                                                    |                                         |
|-------|-----------------------------------|----------------------------------------------------|-----------------------------------------|
|       |                                   | Pvalb Tpbg, Pvalb Cpne5, Pvalb Rspo2, Pvalb Obox3) |                                         |
| Fuzik | Cortex Layer 1 and 2 interneurons | Ndnf cluster (Ndnf Car4, Ndnf Cxcl14)              | Int12, Int15                            |
| Fuzik | Cortex Pyramidal cells            | Pyramidal cluster                                  | Pyramidal cluster (excluding CA1PyrInt) |

705 *Supplementary Table 2: Matching of patch-seq cell types to dissociated cell reference atlases.*

706

| Broad cell type | Tasic subtypes                                                                                                                                                                                                                                       | Zeisel subtypes                                                                                              |
|-----------------|------------------------------------------------------------------------------------------------------------------------------------------------------------------------------------------------------------------------------------------------------|--------------------------------------------------------------------------------------------------------------|
| Astrocyte       | Astro Gja1                                                                                                                                                                                                                                           | Astro2, Astro1                                                                                               |
| Endothelial     | Endo Myl9, Endo Tbc1d4                                                                                                                                                                                                                               | Vsmc                                                                                                         |
| Inhibitory      | Vip Chat, Vip Parm1, Vip Mybpc1, Vip Gpc3, Pvalb Gpx3, Ndnf Cxcl14, Vip Sncg, Ndnf Car4, Sst Myh8, Sst Th, Sst Chodl, Sst Tacstd2, Sst Cdk6, Pvalb Wt1, Sncg, Sst Cbln4, Pvalb Tacr3, Igtp, Smad3, Pvalb Tpbg, Pvalb Cpne5, Pvalb Rspo2, Pvalb Obox3 | Int10, Int6, Int9, Int2, Int4, Int1, Int3, Int13, Int16, Int14, Int11, Int5, Int7, Int8, Int12, Int15        |
| Microglia       | Micro Ctss                                                                                                                                                                                                                                           | Mgl1, Mgl2                                                                                                   |
| Oligodendrocyte | Oligo Opalin, Oligo 96_Rik                                                                                                                                                                                                                           | Oligo1, Oligo3, Oligo4, Oligo2, Oligo6, Oligo5                                                               |
| OPC             | OPC Pdgfra                                                                                                                                                                                                                                           | *                                                                                                            |
| Pyramidal       | L2/3 Ptgs2, L2 Ngb, L4 Ctxn3, L4 Scnn1a, L5a Batf3, L5a Pde1c, L6a Mgp, L6b Serpinb11, L6b Rgs12, L5a Hsd11b1, L4 Arf5, L5a Tcerg1l, L6a Sla, L6a Syt17, L6a Car12, L5b Cdh13, L5 Ucma, L5b Tph2, L5 Chrna6                                          | S1PyrL4, ClauPyr, S1PyrL5, S1PyrL23, S1PyrDL, S1PyrL5a, SubPyr, CA1Pyr1, S1PyrL6b, S1PyrL6, CA1Pyr2, CA2Pyr2 |

707 *Supplementary Table 3. Mapping of broad cell types between Tasic and Zeisel dissociated cell*  
 708 *reference datasets. \* denotes oligodendrocyte precursor cell type not being explicitly labelled in*  
 709 *Zeisel.*

710

711 *Supplementary Table 4: List of cell type-specific markers based on re-analysis of published*  
 712 *dissociated cell-based scRNAseq experiments from mouse brain.*
